# Supplementary material
Source: MDPI journal article supplement (https://www.mdpi.com/2079-9284/9/5/104)
Supplement: s1 [file s1 › cosmetics-1940175-supplementary.pdf]

## Supplementary Materials

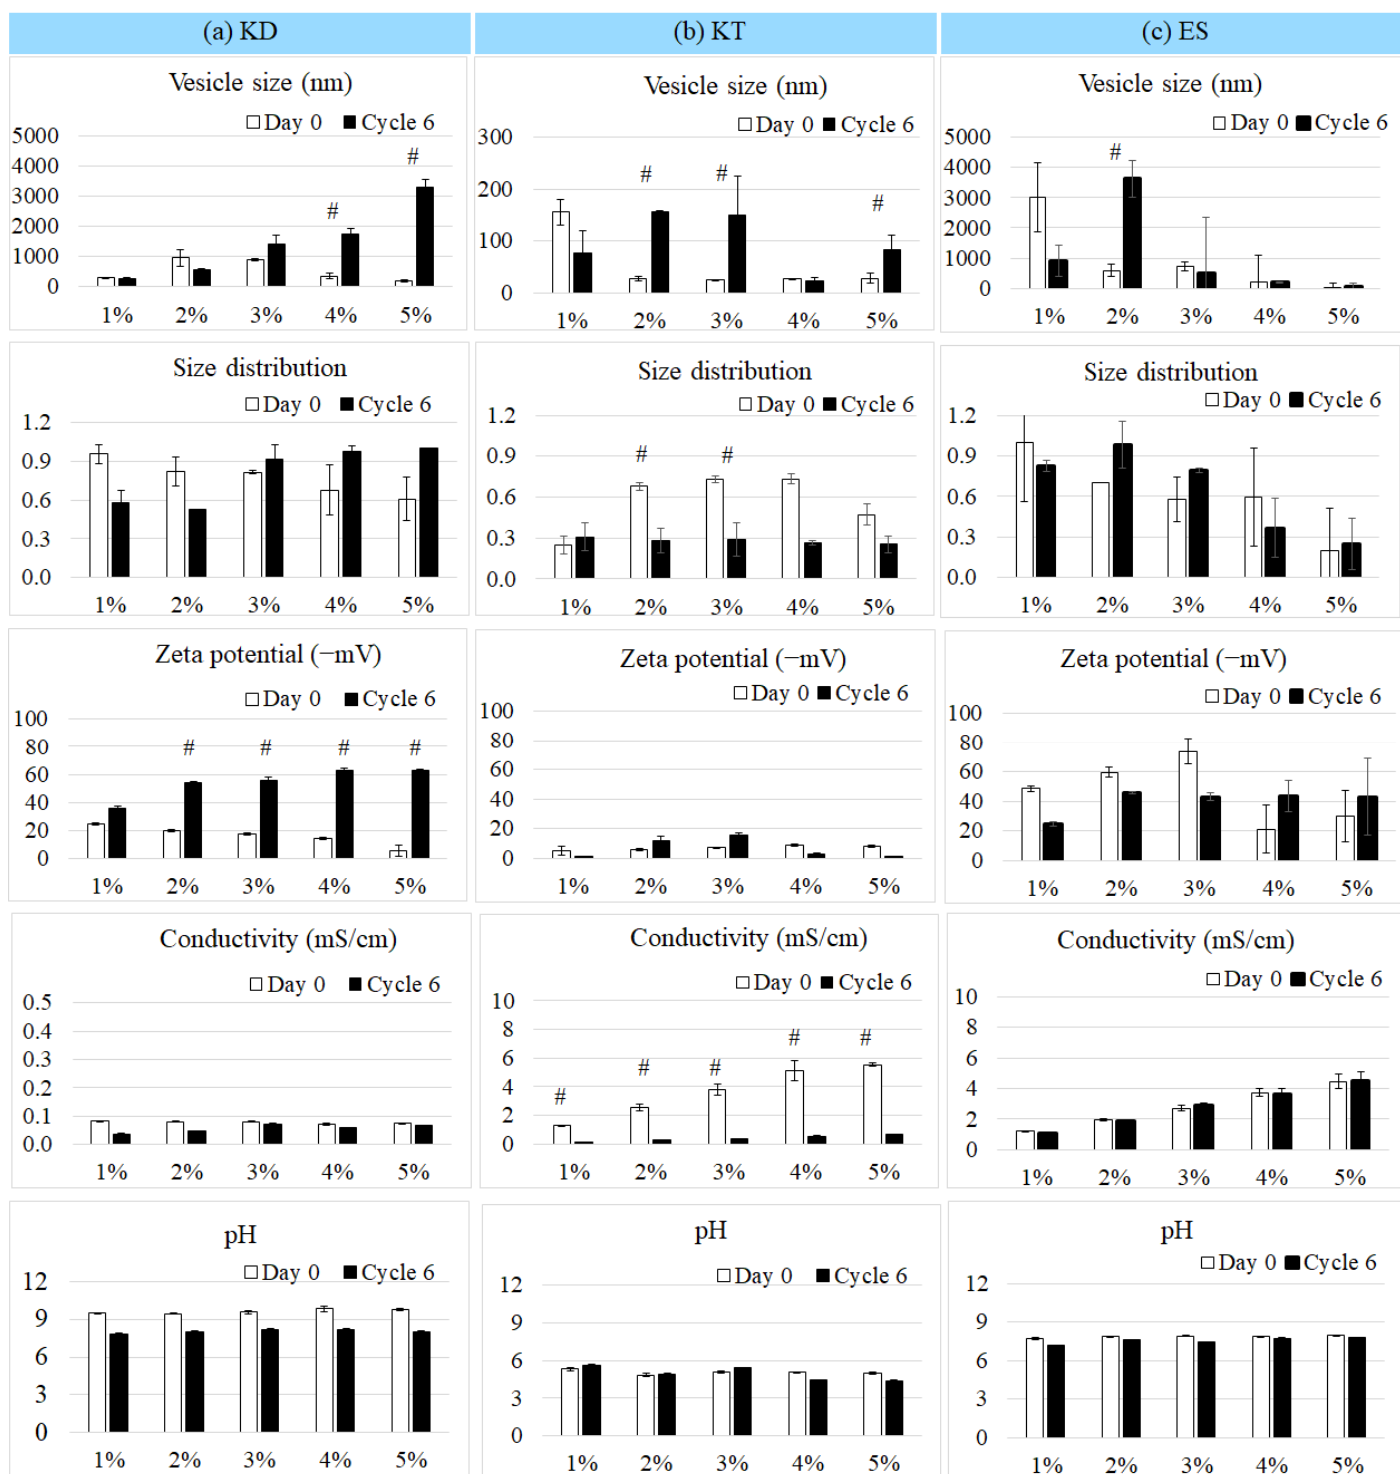

**Figure S1.** The physicochemical properties and the stability of different single-surfactant shampoo formulations: (a) KD, (b) KT and (c). ES. %Different = (Day 0 – Cycle 6)/Day 0 × 100%, # = ≥ 100% different. Abbreviations: Comperlan KD® (KD); Dehyton KT® (KT); Eversoft® YCS-30S (ES).

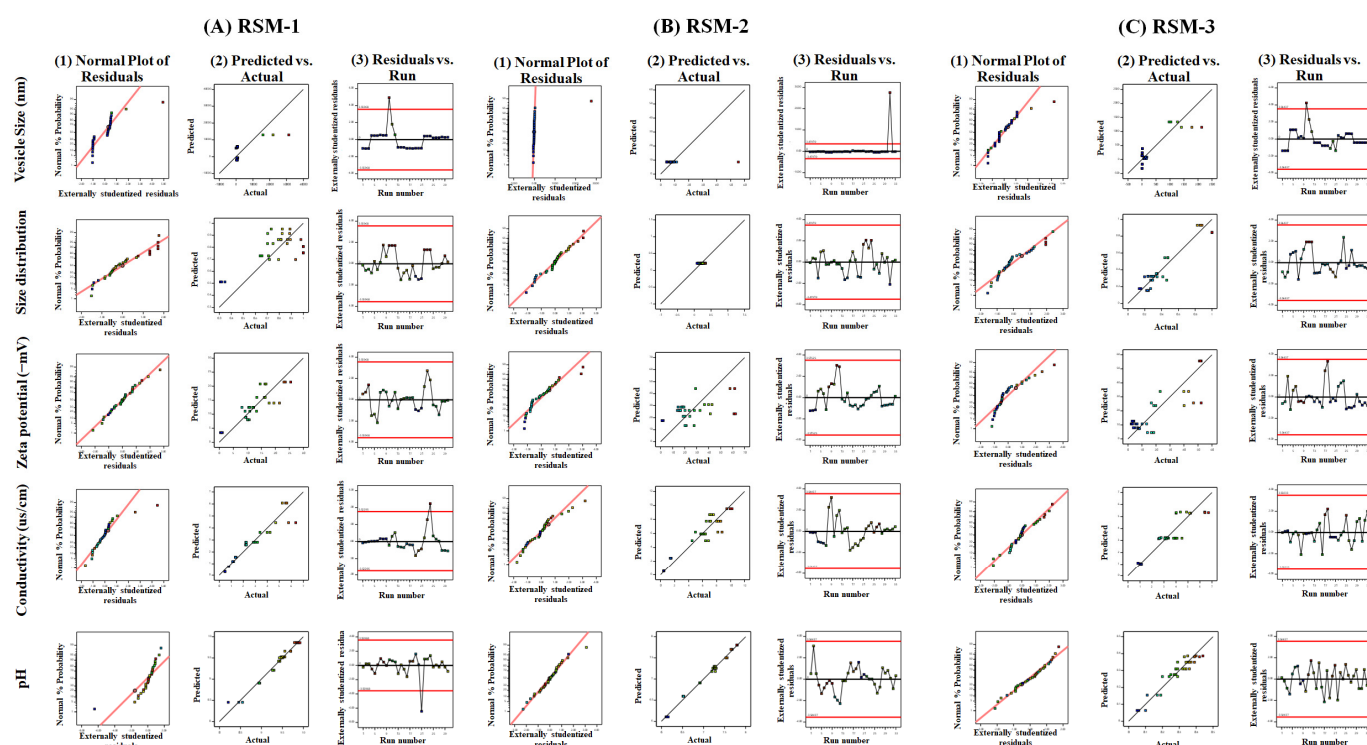

**Figure S2.** The diagnostic plot of (1) normal plot of residuals, (2) predicted vs. actual and (3) residual vs. run of (a) RSM-1, (b) RSM-2 and (c) RSM-3. Abbreviations: Response surface methodology (RSM).

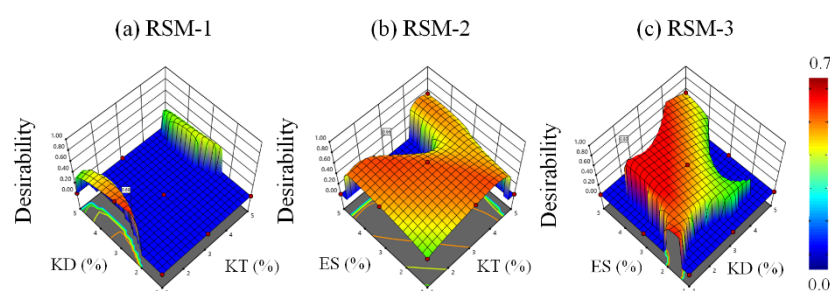

**Figure S3.** The desirability index of the optimal formulations of no-rinse shampoos RSM-1, RSM-2, and RSM-3.

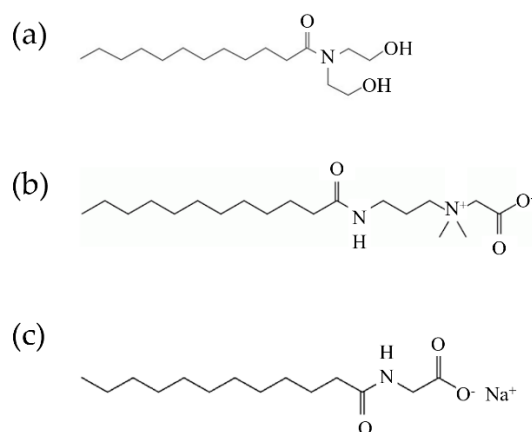

**Figure S4.** Structure of (a) cocamide diethanolamine, (b) cocamidopropyl betaine and (c) sodium cocoyl glycinate.
